# Supplementary material for: Thermochemical energy storage performance of zinc destabilized calcium hydride at high-temperatures
Source: Royal Society of Chemistry journal article supplement (doi:10.1039/d0cp04431h), 2020-01-01
Supplement: d0cp04431h1.pdf [file d0cp04431h1.pdf]

## Thermochemical Energy Storage Performance of Zinc Destabilized Calcium Hydride at High-Temperatures†

Sruthy Balakrishnan,<sup>a</sup> M. Veronica Sofianos,<sup>a,b\*</sup> Terry D. Humphries,<sup>a</sup> Mark Paskevicius,<sup>a\*</sup> and Craig E. Buckley<sup>a</sup>

<sup>a</sup> Physics and Astronomy, Fuels and Energy Technology Institute, Curtin University, GPO Box U1987, Perth, WA 6845, Australia

<sup>a,b</sup> University College Dublin, School of Chemical and Bioprocess Engineering, Belfield, Dublin 4, Ireland

|   | Predicted reaction                                                                         | Theoretical H <sub>2</sub><br>wt% |
|---|--------------------------------------------------------------------------------------------|-----------------------------------|
| 1 | $3\text{CaH}_2 + \text{Zn} \leftrightarrow \text{Ca}_3\text{Zn} + \text{H}_2(\text{g})$    | 3.15                              |
| 2 | $5\text{CaH}_2 + 3\text{Zn} \leftrightarrow \text{Ca}_5\text{Zn}_3 + \text{H}_2(\text{g})$ | 2.47                              |
| 3 | $\text{CaH}_2 + \text{Zn} \leftrightarrow \text{CaZn} + \text{H}_2(\text{g})$              | 1.87                              |
| 4 | $\text{CaH}_2 + 2\text{Zn} \leftrightarrow \text{CaZn}_2 + \text{H}_2(\text{g})$           | 1.16                              |
| 5 | $\text{CaH}_2 + 3\text{Zn} \leftrightarrow \text{CaZn}_3 + \text{H}_2(\text{g})$           | 0.84                              |
| 6 | $\text{CaH}_2 + 5\text{Zn} \leftrightarrow \text{CaZn}_5 + \text{H}_2(\text{g})$           | 0.54                              |
| 7 | $\text{CaH}_2 + 11\text{Zn} \leftrightarrow \text{CaZn}_{11} + \text{H}_2(\text{g})$       | 0.26                              |
| 8 | $\text{CaH}_2 + 13\text{Zn} \leftrightarrow \text{CaZn}_{13} + \text{H}_2(\text{g})$       | 0.22                              |

**Table S1.** Theoretical predictions of possible reaction between CaH<sub>2</sub> and Zn and corresponding H<sub>2</sub> wt. %.

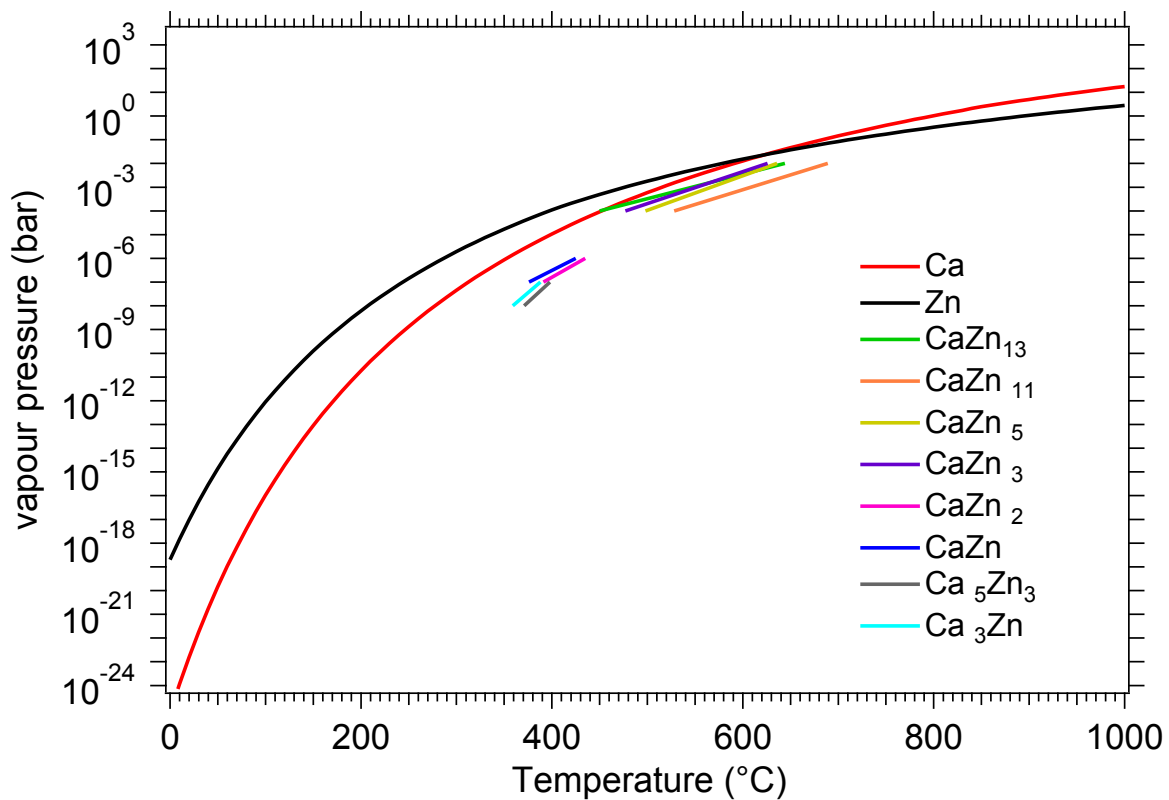

**Fig. S1.** Vapour pressure curves for pure Ca and Zn and calcium zinc alloys as a function of temperature.<sup>1-4</sup>

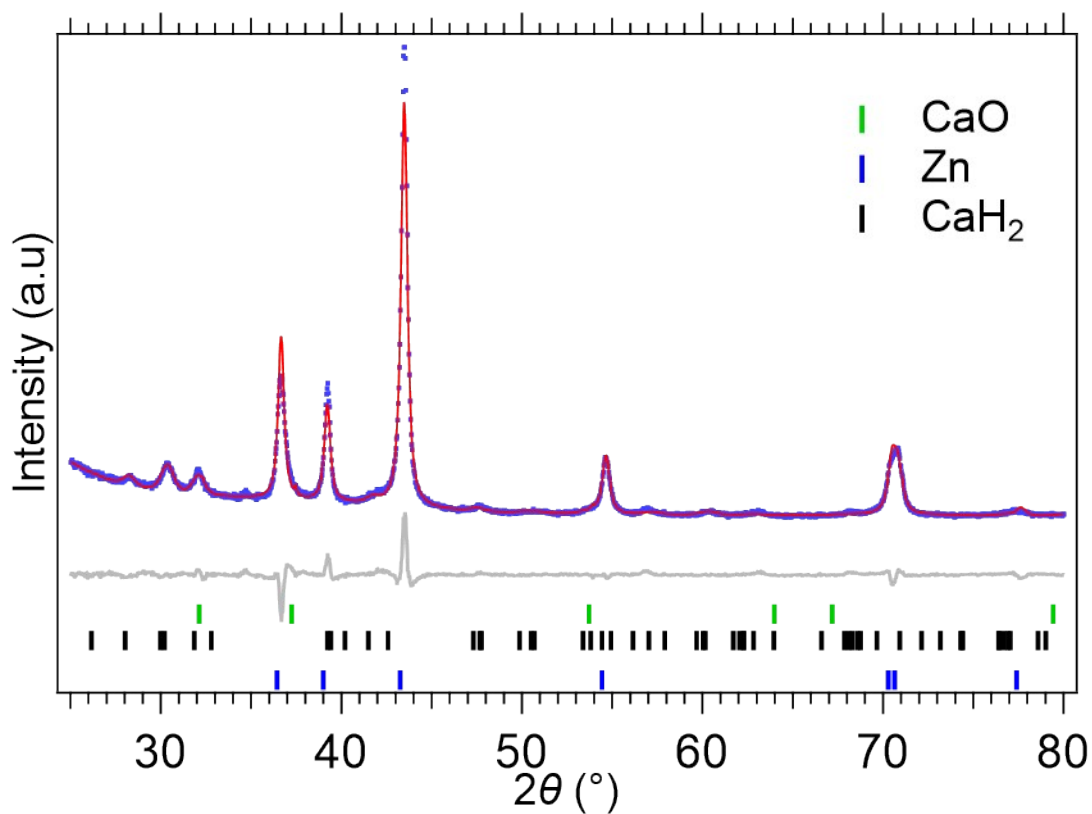

**Fig. S2** Rietveld refinement of the diffraction pattern for CaH<sub>2</sub>-3Zn system after ball milling (Cu K $\alpha$  radiation ( $\lambda = 1.5418 \text{ \AA}$ )).

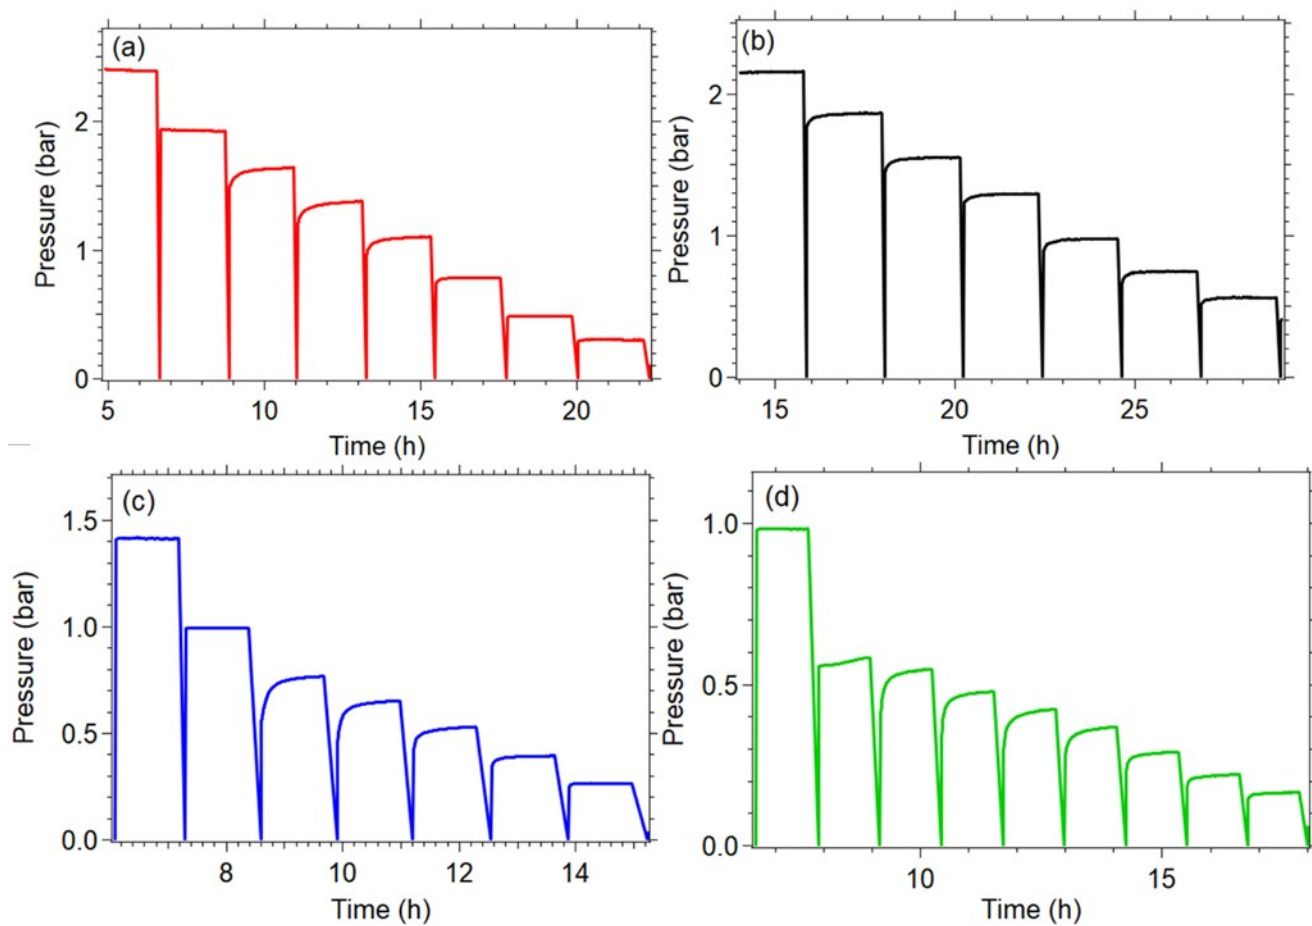

**Fig. S3** Equilibrium pressure curves of PCI performed at (a) 614 °C (b) 600 °C (c) 580 °C and (d) 565 °C with 3 h desorption step sizes.

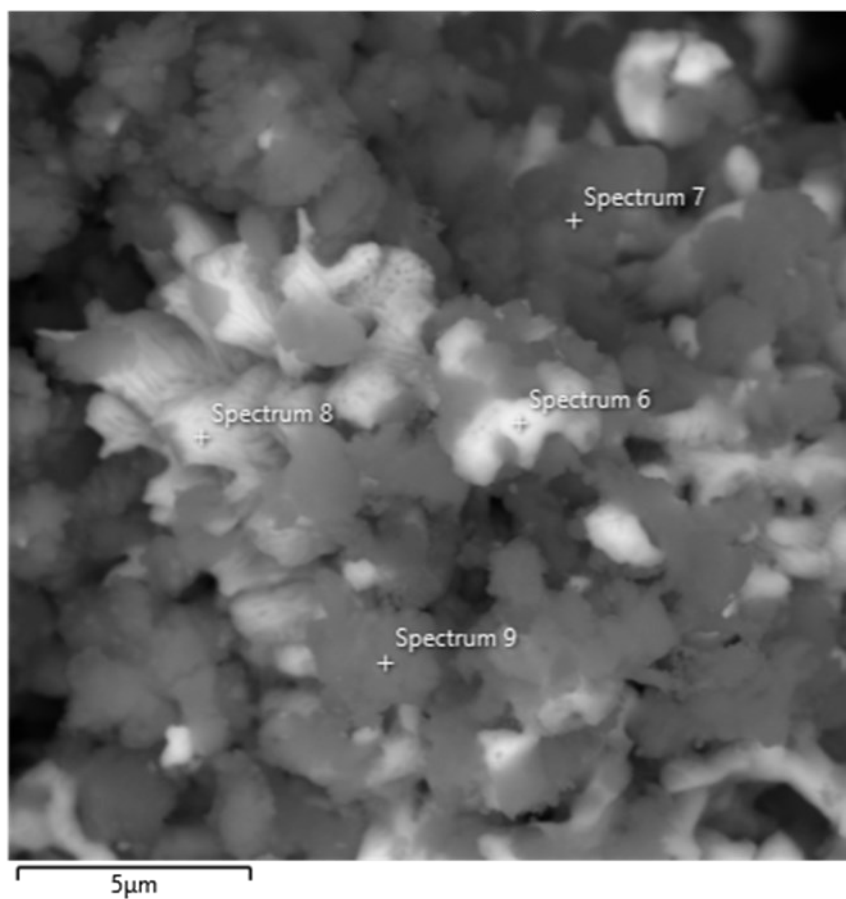

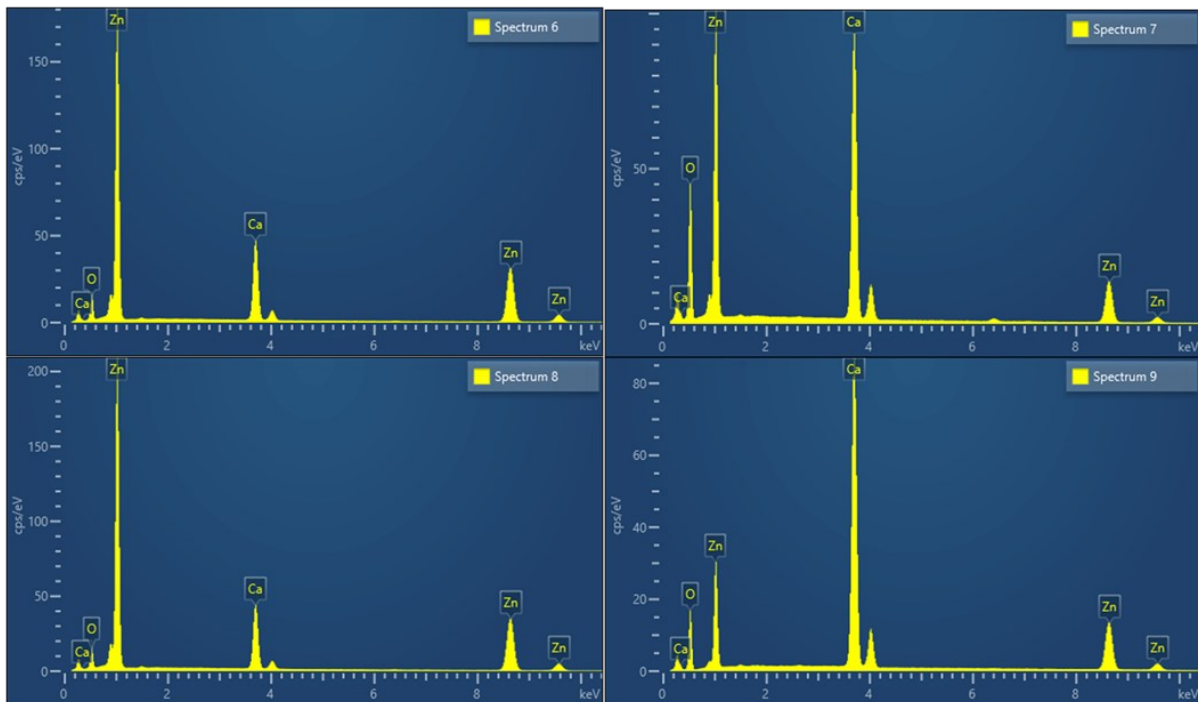

**Fig. S4** SEM images of  $\text{CaH}_2\text{-3Zn}$  after 10 cycles using backscattered electrons and corresponding EDS spectrum.

- (1) Chiotti, P.; Hecht, R., Thermodynamic Properties of the Calcium-Zinc System. *AIME MET SOC TRANS* 1967, **239**, 536-541.
- (2) Itkin, V.; Alcock, C., The Ca-Zn (Calcium-Zinc) System. *Bulletin of Alloy Phase Diagrams* 1990, **11**, 328-333.
- (3) Vapor Pressure Calculator. [https://www.iap.tuwien.ac.at/www/surface/vapor\\_pressure](https://www.iap.tuwien.ac.at/www/surface/vapor_pressure) (accessed May, 2020)
- (4) Hodge, W.; Jaffe, R.; Gonser, B. *Calcium and Calcium-Base Alloys*; BATTELLE MEMORIAL INST COLUMBUS OH: 1949.
